# Supplementary material for: Horizontal Transfer of a Novel Soil Agarase Gene from Marine Bacteria to Soil Bacteria via Human Microbiota
Source: PubMed Central journal article supplement (PMC5069468; doi:10.1038/srep34103), 2016-10-19
Supplement: srep34103-s1.pdf [file srep34103-s1.pdf]

**Horizontal Transfer of a Novel Soil Agarase Gene from Marine Bacteria to Soil  
Bacteria via Human Microbiota**

Tao Song<sup>a\*</sup>, Hui Xu<sup>a\*</sup>, Congchong Wei<sup>a</sup>, Tengfei Jiang<sup>a</sup>, Shishang Qin<sup>a</sup>, Weijia Zhang<sup>a</sup>,  
Yu Cao<sup>a,b</sup>, Chao Hu<sup>a</sup>, Fan Zhang<sup>a</sup>, Dairong Qiao<sup>a\*\*</sup>, Yi Cao<sup>a\*\*</sup>

Microbiology and Metabolic Engineering of Key Laboratory of Sichuan Province,  
College of Life Science, Sichuan University, Chengdu, 610065,, P. R. China<sup>a</sup> ;  
National Engineering Research Center for Biomaterials, Sichuan University, Chengdu,  
610065, P. R. China<sup>b</sup>.

\* Co-first author \*\*Co-Corresponding author;

#Address correspondence to Yi Cao: [geneium@scu.edu.cn](mailto:geneium@scu.edu.cn); Dairong Qiao:

[qiaodairong@scu.edu.cn](mailto:qiaodairong@scu.edu.cn);

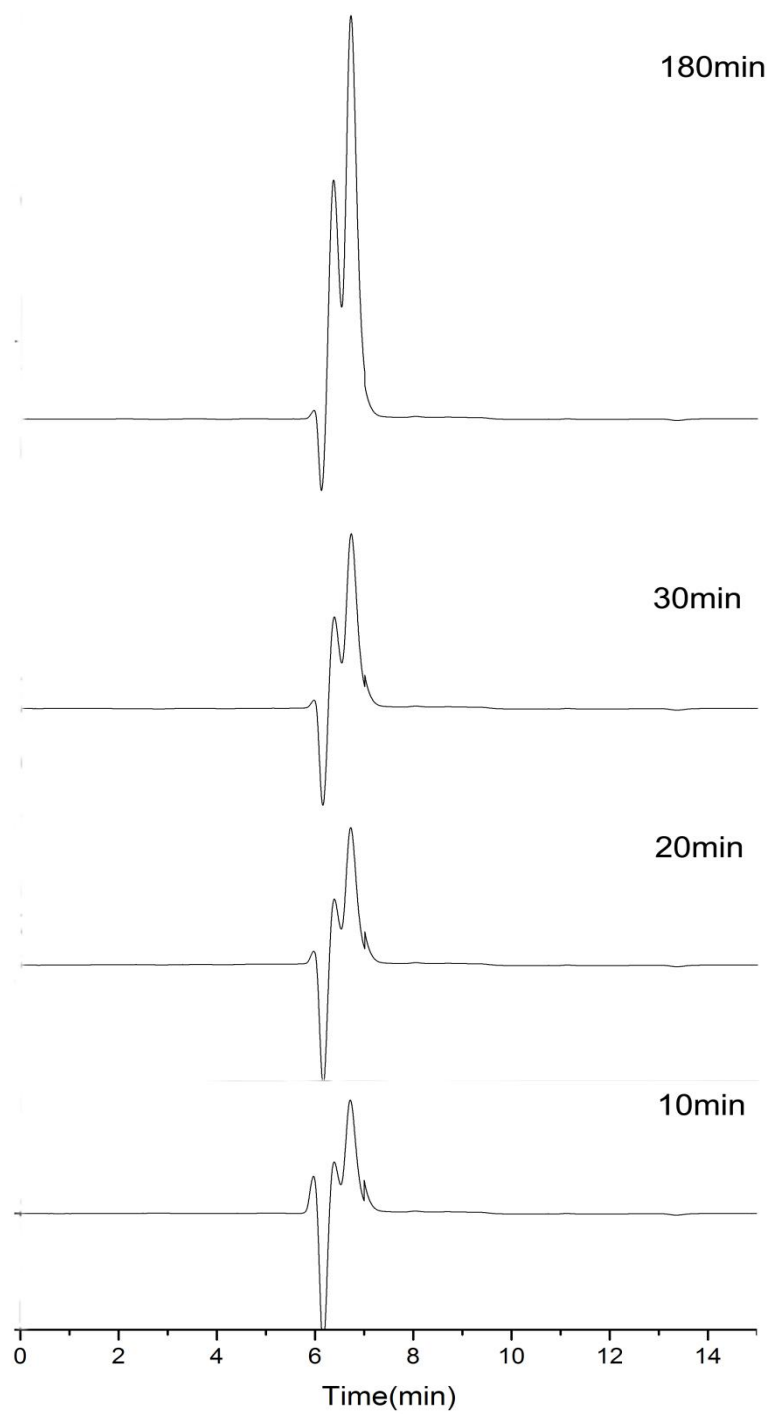

Supplemental Figure S1: HPLC analysis of the hydrolysis product at different time.

Supplemental Table S1: Mascot search result using tandem mass data as query. If Pep\_scores of matched peptides were more than 50, the results were confident.

| Matched protein | Pep_score | Sequences of matched peptides      |
|-----------------|-----------|------------------------------------|
| Aga 1           | 130.61    | AEVVAQDALATDSEINTALEDLTK           |
| Aga 1           | 163.32    | YHVNSGPIGVEQADGEITVLDEAYHK         |
| Aga 1           | 155.79    | FYVFSPTTEPITNAALAFDR               |
| Aga 1           | 56.37     | ISFEDGEAVDYTYNVDTVTTTTDSQGATDGSK   |
| Aga 1           | 74.51     | MGFQESNPTEGITHPWLIKDENGDVIYDGYK    |
| Aga 1           | 92.28     | WMWENPNSGQSEHFGTPSYSNFDAAADAAAQLIK |

Supplemental Table S2: Effects of various reagents on the activity of Aga 1. Data are mean  $\pm$  SD of three independent experiments.

| Reagents(1mM)    | Relativity activity (% $\pm$ S.D.) |
|------------------|------------------------------------|
| Na <sup>+</sup>  | 107.57 $\pm$ 4.14                  |
| K <sup>+</sup>   | 104.93 $\pm$ 2.13                  |
| Mn <sup>2+</sup> | 93.54 $\pm$ 16.89                  |
| Cu <sup>2+</sup> | 37.87 $\pm$ 1.94                   |
| Zn <sup>2+</sup> | 83.51 $\pm$ 5.71                   |
| Ba <sup>2+</sup> | 113.57 $\pm$ 8.62                  |
| Ca <sup>2+</sup> | 99.24 $\pm$ 9.70                   |
| Fe <sup>3+</sup> | 104.31 $\pm$ 3.10                  |
| Ni <sup>+</sup>  | 102.86 $\pm$ 1.43                  |
| Mg <sup>2+</sup> | 111.51 $\pm$ 2.33                  |
| Pb <sup>2+</sup> | 96.58 $\pm$ 6.93                   |
| Co <sup>2+</sup> | 95.69 $\pm$ 3.80                   |
| $\beta$ -Me      | 122.33 $\pm$ 7.18                  |
| DTT              | 133.44 $\pm$ 11.59                 |
| SDS              | 118.84 $\pm$ 10.08                 |
| EDTA             | 104.02 $\pm$ 7.02                  |
| Urea             | 97.74 $\pm$ 11.24                  |
| Control          | 100.00 $\pm$ 12.95                 |

Supplemental Table S3: GC content variety and GC3 content variety between Aga 1 and corresponding genome

| ID    | GC content variety | GC3s content variety |
|-------|--------------------|----------------------|
| Aga 1 | 8.72               | 19.60                |

Supplemental Table S4: Analysis of the RSCU difference between Aga 1 and the

genome, RSCU represents relative synonymous codon usage

|       | Code | Aga 1<br>RSCU | Genome<br>RSCU |     | Code   | Aga 1<br>RSCU | Genome<br>RSCU |
|-------|------|---------------|----------------|-----|--------|---------------|----------------|
| Ala   | GCA  | 1.3037        | 0.606          | Cys | UGC    | 0             | 1.538          |
|       | GCC  | 0.7111        | 1.4822         |     | UGU    | 2             | 0.462          |
|       | GCG  | 1.1556        | 1.3331         | Asp | GAC    | 0.6281        | 1.02           |
|       | GCU  | 0.8296        | 0.5787         |     | GAU    | 1.3719        | 0.981          |
| Gly   | GGA  | 1.1171        | 0.8914         | Glu | GAA    | 1.0323        | 1.003          |
|       | GGC  | 1.5856        | 1.7346         |     | GAG    | 0.9677        | 0.997          |
|       | GGG  | 0.3243        | 0.8198         | Phe | UUC    | 1.2239        | 1.016          |
|       | GGU  | 0.973         | 0.5541         |     | UUU    | 0.7761        | 0.984          |
| Leu   | CUA  | 0.3652        | 0.1564         | His | CAC    | 0.8148        | 0.739          |
|       | CUC  | 0.3652        | 0.9367         |     | CAU    | 1.1852        | 1.261          |
|       | CUG  | 1.6696        | 2.9811         | Ile | AUA    | 0.4369        | 0.198          |
|       | CUU  | 1.4609        | 0.7406         |     | AUC    | 0.7282        | 1.721          |
|       | UUA  | 0.8348        | 0.3268         | AUU | 1.835  | 1.082         |                |
|       | UUG  | 1.3043        | 0.8585         | Met | AUG    | 1             | 1              |
| Lys   | AAA  | 0.8837        | 0.9163         | Pro | CCA    | 1.3731        | 0.369          |
|       | AAG  | 1.1163        | 1.0837         |     | CCC    | 0.1791        | 0.677          |
| Asn   | AAC  | 0.6733        | 1.2099         | Ser | CCG    | 1.1343        | 2.318          |
|       | AAU  | 1.3267        | 0.7901         |     | CCU    | 1.3134        | 0.636          |
| Arg   | AGA  | 2.2642        | 0.5212         |     | AGC    | 1.6034        | 1.805          |
|       | AGG  | 0.1132        | 0.5075         |     | AGU    | 0.931         | 0.385          |
|       | CGA  | 0.6792        | 0.3655         | UCA | 0.6724 | 0.393         |                |
|       | CGC  | 1.2453        | 1.78           | UCC | 1.2414 | 1.587         |                |
|       | CGG  | 0.4528        | 2.0344         | UCG | 0.9828 | 1.385         |                |
|       | CGU  | 1.2453        | 0.7913         | UCU | 0.569  | 0.445         |                |
| SeCys | ACA  | 1.4444        | 0.5055         | Val | GUA    | 0.8254        | 0.569          |
|       | ACC  | 0.4444        | 1.344          |     | GUC    | 0.6349        | 1.323          |
|       | ACG  | 1.3056        | 1.8481         |     | GUG    | 1.1429        | 1.423          |
|       | ACU  | 0.8056        | 0.3024         |     | GUU    | 1.3968        | 0.685          |
| Gly   | CAA  | 0.7347        | 0.5766         | Tyr | UAC    | 0.6111        | 0.988          |
|       | CAG  | 1.2653        | 1.4234         |     | UAU    | 1.3889        | 1.012          |
| Trp   | UGG  | 1             | 1              | Ter | UAG    | 3             | 0.589          |

Supplemental Table S5: The primers used for Aga 1. The restrict enzyme sites were red colored.

| Name   | Sequence of oligosaccharide primer  |
|--------|-------------------------------------|
| Aga(F) | ATTT <b>GCGGCCG</b> CGTTGAGGCAAGCGA |
| Aga(R) | CCG <b>CTCGAG</b> AATGACGGCGTAAGTGC |

Supplemental Table S6: Accession number and origin of the query protein

| Gene function                                | Accession Number | Origin                             |
|----------------------------------------------|------------------|------------------------------------|
| $\alpha$ -neoagarobiose hydrolase            | WP_013995985.1   | <i>Zobellia galactanivorans</i>    |
| galactosidase                                | WP_014232195.1   | <i>Vibrio sp.</i> EJY3             |
| 3,6-anhydro-L-galactonate cycloisomerase     | WP_014232231.1   | <i>Vibrio sp.</i> EJY3             |
| 2,5-diketo-3-deoxy-L-galactonate 5-reductase | WP_011575334.1   | <i>Pseudoalteromonas atlantica</i> |
| 3,6-anhydro-L-galactose dehydrogenase        | WP_014232205.1   | <i>Vibrio sp.</i> EJY3             |
| 2-keto-3-deoxy-L-galactonate 5-dehydrogenase | WP_011575334.1   | <i>Pseudoalteromonas atlantica</i> |

Supplemental Table S6: Accession numbers of Aga's surrounding proteins

| Gene locus | Gene function                                | Accession number |
|------------|----------------------------------------------|------------------|
| 7137       | transposase                                  | LC164143         |
| 7138       | transposase                                  | LC164144         |
| 7142       | $\alpha$ -neoagarobiose hydrolase            | LC164136         |
| 7144       | 3,6-anhydro-L-galactonate cycloisomerase     | LC164138         |
| 7145       | 2,5-diketo-3-deoxy-L-galactonate 5-reductase | LC164141         |
| 7146       | 3,6-anhydro-L-galactose dehydrogenase        | LC164140         |
| 7155       | 3,6-anhydro-L-galactose dehydrogenase        | LC164137         |
| 7156       | galactosidase                                | LC164139         |
| 7158       | sulfatase                                    | LC164142         |
